# Supplementary material
Source: publisher figshare collection journal article supplement (https://gsajournals.figshare.com/ndownloader/files/35026369)
Supplement: Supplementary file 1 [file 35026369]

## Sheet: Sheet1
ID	Mitolineage	Sex	Latitude	Longitude	Location	Population Status
024-96401	B	M	-36.8337	144.23	Crusoe Reservoir and No. 7 Park	Hybrid
024-96402	A	F	-36.8337	144.23	Crusoe Reservoir and No. 7 Park	Hybrid
024-96403	B	M	-36.8614	144.312	Crusoe Reservoir and No. 7 Park	Hybrid
024-96404	A	M	-36.5026	144.37	Greater Bendigo National Park	Pure
024-96405	A	M	-37.0599	144.089	Muckleford State Forest	Hybrid
024-96406	A	F	-36.5002	144.368	Greater Bendigo National Park	Pure
024-96407	A	F	-36.8606	144.308	Crusoe Reservoir and No. 7 Park	Hybrid
024-96408	A	M	-36.8614	144.312	Crusoe Reservoir and No. 7 Park	Hybrid
024-96409	A	F	-36.6845	144.237	Greater Bendigo National Park	Pure
024-96410	A	M	-37.0817	144.074	Muckleford State Forest	Hybrid
024-96411	B	M	-37.0577	144.112	Muckleford State Forest	Hybrid
024-96412	A	F	-37.0599	144.089	Muckleford State Forest	Hybrid
024-96413	B	M	-37.0799	144.074	Muckleford State Forest	Hybrid
024-96414	B	F	-37.0615	144.09	Muckleford State Forest	Hybrid
024-96415	B	M	-37.1572	144.076	Rise and Shine Bushland Reserve	Pure
024-96416	B	M	-37.1687	144.079	Rise and Shine Bushland Reserve	Pure
024-96417	B	M	-37.0768	144.075	Muckleford State Forest	Hybrid
024-96418	B	M	-37.0835	144.077	Muckleford State Forest	Hybrid
024-96419	A	F	-36.8253	144.221	Crusoe Reservoir and No. 7 Park	Hybrid
024-96420	A	M	-36.806	144.203	Bendigo Regional Park	Hybrid
024-96421	B	M	-37.0614	144.063	Muckleford State Forest	Hybrid
024-96423	A	M	-36.8062	144.202	Bendigo Regional Park	Hybrid
024-96424	B	F	-36.8245	144.219	Crusoe Reservoir and No. 7 Park	Hybrid
024-96426	A	M	-36.8314	144.22	Crusoe Reservoir and No. 7 Park	Hybrid
024-96427	A	M	-36.8062	144.202	Bendigo Regional Park	Hybrid
024-96428	B	M	-36.8242	144.219	Crusoe Reservoir and No. 7 Park	Pure
024-96429	A	F	-36.8257	144.218	Crusoe Reservoir and No. 7 Park	Hybrid
024-96431	A	M	-36.996	143.748	Timor State Forest	Pure
024-96432	A	F	-36.9758	143.735	Timor State Forest	Pure
024-96433	B	M	-37.3545	144.226	Wombat State Forest	Pure
024-96435	B	M	-37.3566	144.227	Wombat State Forest	Pure
024-96436	A	M	-36.9711	143.733	Timor State Forest	Pure
024-96437	B	F	-37.0804	144.073	Muckleford State Forest	Hybrid
024-96438	B	M	-37.4329	144.24	Wombat State Forest	Pure
024-96439	A	M	-37.0246	143.78	Havelock State Forest	Pure
024-96440	B	M	-37.3615	144.229	Wombat State Forest	Pure
024-96441	A	M	-36.8232	144.217	Crusoe Reservoir and No. 7 Park	Hybrid
024-96442	B	M	-37.3587	144.227	Wombat State Forest	Pure
024-96443	B	F	-36.8255	144.22	Crusoe Reservoir and No. 7 Park	Hybrid
024-96444	A	M	-36.8251	144.221	Crusoe Reservoir and No. 7 Park	Hybrid
024-96446	B	M	-37.1661	144.074	Rise and Shine Bushland Reserve	Pure
024-96447	A	F	-37.0997	144.103	Muckleford State Forest	Hybrid
024-96448	B	M	-37.0656	144.055	Muckleford State Forest	Hybrid
024-96450	B	M	-37.3524	144.236	Wombat State Forest	Pure
024-96451	A	M	-37.0602	144.089	Muckleford State Forest	Hybrid
024-96452	A	F	-37.0296	143.774	Havelock State Forest	Pure
024-96453	B	F	-37.0777	144.076	Muckleford Nature Conservation Reserve	Hybrid
024-96454	B	M	-37.3503	144.231	Wombat State Forest	Pure
024-96455	A	F	-37	143.75	Timor State Forest	Pure
024-96456	A	F	-36.9841	143.737	Timor State Forest	Pure
024-96457	B	M	-37.3505	144.23	Wombat State Forest	Pure
024-96458	B	F	-37.0609	144.093	Muckleford Nature Conservation Reserve	Hybrid
024-96459	B	M	-37.0609	144.093	Muckleford State Forest	Hybrid
024-96460	B	M	-37.3515	144.231	Wombat State Forest	Pure
024-96461	B	F	-37.0991	144.109	Muckleford State Forest	Hybrid
024-96462	B	F	-37.3508	144.23	Wombat State Forest	Pure
024-96463	A	M	-37.0263	143.775	Havelock State Forest	Pure
024-96464	B	M	-37.3526	144.235	Wombat State Forest	Pure
024-96466	B	M	-37.3505	144.23	Wombat State Forest	Pure
024-96467	A	M	-36.9798	143.74	Timor State Forest	Pure
024-96468	A	M	-36.8233	144.22	Crusoe Reservoir and No. 7 Park	Hybrid
024-96469	B	F	-37.0616	144.096	Muckleford State Forest	Hybrid
024-96473	B	F	-37.357	144.227	Wombat State Forest	Pure
024-96474	A	F	-36.8229	144.223	Crusoe Reservoir and No. 7 Park	Hybrid
024-96475	A	F	-37.0271	143.775	Havelock Nature Conservation Reserve	Pure
024-96476	B	M	-37.3498	144.232	Wombat State Forest	Pure
024-96477	B	M	-37.357	144.227	Wombat State Forest	Pure
024-96481	A	M	-36.8232	144.219	Crusoe Reservoir and No. 7 Park	Hybrid
024-96483	A	F	-36.8232	144.219	Crusoe Reservoir and No. 7 Park	Hybrid
024-96485	B	F	-37.0994	144.107	Muckleford State Forest	Hybrid
024-96487	B	M	-37.0612	144.088	Muckleford State Forest	Hybrid
024-96488	A	M	-37.0018	143.75	Timor State Forest	Pure
026-01000	B	M	-37.2314	144.278	Upper Loddon State Forest	Pure
026-30474	B	F	-37.1611	145.194	Tallarook State Forest	Pure
026-30475	B	F	-37.1611	145.194	Tallarook State Forest	Pure
026-30476	B	M	-37.1619	145.195	Tallarook State Forest	Pure
026-30477	B	F	-36.8337	144.23	Crusoe Reservoir and No. 7 Park	Hybrid
026-30478	A	M	-36.8669	144.312	Crusoe Reservoir and No. 7 Park	Hybrid
026-30479	A	M	-36.5043	144.374	Greater Bendigo National Park	Pure
026-30480	B	M	-37.0399	144.098	Muckleford State Forest	Hybrid
026-30481	B	F	-37.0769	144.12	Muckleford State Forest	Hybrid
026-30482	B	F	-37.1589	144.077	Rise and Shine Bushland Reserve	Pure
026-30483	B	M	-37.0573	144.114	Muckleford Nature Conservation Reserve	Hybrid
026-30484	B	M	-37.0787	144.074	Muckleford State Forest	Hybrid
026-30485	B	M	-37.0824	144.077	Muckleford State Forest	Hybrid
026-30486	A	F	-36.8467	144.303	Greater Bendigo National Park	Hybrid
026-30487	A	M	-36.8467	144.303	Greater Bendigo National Park	Hybrid
026-30488	B	F	-37.0636	144.058	Muckleford State Forest	Hybrid
026-30489	A	M	-37.0269	143.773	Havelock State Forest	Pure
026-30490	A	F	-36.97	143.733	Timor State Forest	Pure
026-30491	B	M	-37.3503	144.237	Wombat State Forest	Pure
026-30492	A	M	-37.0018	143.75	Timor State Forest	Pure
026-30493	A	M	-36.8254	144.218	Crusoe Reservoir and No. 7 Park	Pure
026-30494	B	M	-37.0977	144.108	Muckleford State Forest	Hybrid
026-30495	A	M	-37.0268	143.774	Havelock State Forest	Pure
026-30496	B	M	-37.3515	144.231	Wombat State Forest	Pure
026-30497	B	M	-37.3609	144.228	Wombat State Forest	Pure
026-30498	A	F	-36.8261	144.205	Crusoe Reservoir and No. 7 Park	Hybrid
026-30499	A	F	-36.8229	144.223	Crusoe Reservoir and No. 7 Park	Hybrid
026-37101	B	M	-36.8337	144.23	Crusoe Reservoir and No. 7 Park	Hybrid
026-37102	A	M	-36.6887	144.234	Greater Bendigo National Park	Pure
026-37103	A	M	-36.8669	144.312	Crusoe Reservoir and No. 7 Park	Hybrid
026-37104	B	M	-37.0766	144.122	Muckleford State Forest	Hybrid
026-37105	A	M	-37.0384	144.101	Muckleford State Forest	Hybrid
026-37106	A	M	-36.8597	144.309	Crusoe Reservoir and No. 7 Park	Hybrid
026-37107	A	M	-36.864	144.313	Crusoe Reservoir and No. 7 Park	Hybrid
026-37108	A	M	-36.6887	144.234	Greater Bendigo National Park	Pure
026-37109	B	F	-37.0384	144.101	Muckleford State Forest	Hybrid
026-37110	B	F	-37.0619	144.089	Muckleford State Forest	Hybrid
026-37111	B	F	-37.0791	144.075	Muckleford State Forest	Hybrid
026-37112	A	M	-36.8253	144.221	Crusoe Reservoir and No. 7 Park	Hybrid
026-37113	A	M	-36.8242	144.219	Crusoe Reservoir and No. 7 Park	Hybrid
026-37114	B	F	-37.1687	144.079	Rise and Shine Bushland Reserve	Pure
026-37115	B	M	-37.08	144.075	Muckleford State Forest	Hybrid
026-37116	B	M	-37.0798	144.074	Muckleford State Forest	Hybrid
026-37117	B	M	-37.0768	144.075	Muckleford State Forest	Hybrid
026-37118	B	F	-37.0573	144.114	Muckleford Nature Conservation Reserve	Hybrid
026-37119	B	M	-37.1665	144.078	Rise and Shine Bushland Reserve	Pure
026-37120	B	M	-37.0791	144.079	Muckleford State Forest	Hybrid
026-37121	A	M	-36.8467	144.303	Greater Bendigo National Park	Hybrid
026-37122	A	M	-36.8467	144.303	Greater Bendigo National Park	Hybrid
026-37123	A	F	-36.8261	144.22	Crusoe Reservoir and No. 7 Park	Hybrid
026-37125	B	M	-36.8062	144.202	Bendigo Regional Park	Hybrid
026-37126	B	F	-36.8062	144.202	Bendigo Regional Park	Hybrid
026-37127	A	F	-36.806	144.203	Bendigo Regional Park	Pure
026-37129	B	M	-37.0636	144.058	Muckleford State Forest	Hybrid
026-37132	A	M	-37.0018	143.75	Timor State Forest	Pure
026-37133	B	M	-37.3512	144.231	Wombat State Forest	Pure
026-37136	B	M	-37.3574	144.226	Wombat State Forest	Pure
026-37137	B	M	-37.351	144.234	Wombat State Forest	Pure
026-37139	A	M	-37.0269	143.773	Havelock State Forest	Pure
026-37140	B	M	-37.0994	144.107	Muckleford Nature Conservation Reserve	Hybrid
026-37141	B	F	-37.1667	144.077	Rise and Shine Bushland Reserve	Pure
026-37143	B	F	-37.0656	144.055	Muckleford State Forest	Hybrid
026-37144	A	M	-36.8286	144.218	Crusoe Reservoir and No. 7 Park	Hybrid
026-37145	B	M	-37.3616	144.22	Wombat State Forest	Pure
026-37146	A	F	-36.8254	144.218	Crusoe Reservoir and No. 7 Park	Hybrid
026-37148	B	F	-37.167	144.077	Muckleford State Forest	Hybrid
026-37150	B	M	-37.0608	144.093	Muckleford State Forest	Hybrid
026-37151	A	M	-36.9841	143.737	Timor State Forest	Pure
026-37152	A	F	-36.9998	143.75	Timor State Forest	Pure
026-37153	B	M	-37.3606	144.229	Wombat State Forest	Pure
026-37154	B	M	-37.0601	144.089	Muckleford Nature Conservation Reserve	Hybrid
026-37155	B	M	-37.0794	144.079	Muckleford State Forest	Hybrid
026-37156	B	F	-37.039	144.099	Muckleford State Forest	Hybrid
026-37157	B	M	-37.3503	144.231	Wombat State Forest	Pure
026-37158	A	F	-37.0274	143.774	Havelock State Forest	Pure
026-37159	A	F	-37.0268	143.774	Havelock State Forest	Pure
026-37160	A	M	-37.0618	144.089	Muckleford State Forest	Hybrid
026-37161	B	M	-37.3499	144.23	Wombat State Forest	Pure
026-37164	A	M	-37.0263	143.775	Havelock State Forest	Pure
026-37165	B	M	-37.3507	144.23	Wombat State Forest	Pure
026-37166	B	F	-37.3515	144.231	Wombat State Forest	Pure
026-37168	B	M	-37.3516	144.234	Wombat State Forest	Pure
026-37169	A	M	-36.9815	143.737	Timor State Forest	Pure
026-37172	A	M	-36.8254	144.218	Crusoe Reservoir and No. 7 Park	Hybrid
026-37173	A	F	-37.0278	143.773	Havelock State Forest	Pure
026-37174	A	F	-36.9765	143.736	Timor State Forest	Pure
026-37175	B	M	-37.3493	144.232	Wombat State Forest	Pure
026-37177	A	M	-36.9769	143.739	Timor State Forest	Pure
026-37178	B	M	-37.358	144.228	Wombat State Forest	Pure
026-37185	A	M	-36.8229	144.223	Crusoe Reservoir and No. 7 Park	Hybrid
026-37193	B	F	-37.3574	144.226	Wombat State Forest	Pure
026-37198	B	M	-37.0829	144.077	Muckleford State Forest	Hybrid
026-37199	B	M	-37.3493	144.232	Wombat State Forest	Pure
026-37200	A	M	-36.8261	144.22	Crusoe Reservoir and No. 7 Park	Hybrid
026-63001	A	M	-36.864	144.313	Greater Bendigo National Park	Hybrid
026-63002	B	M	-37.1665	144.078	Rise and Shine Bushland Reserve	Pure
026-63003	B	M	-37.0777	144.12	Muckleford State Forest	Hybrid
026-63004	B	M	-37.0613	144.09	Muckleford State Forest	Hybrid
026-63005	A	F	-36.8669	144.312	Crusoe Reservoir and No. 7 Park	Hybrid
026-63006	A	M	-36.6845	144.237	Greater Bendigo National Park	Pure
026-63007	A	M	-36.8669	144.312	Crusoe Reservoir and No. 7 Park	Hybrid
026-63008	B	M	-37.1589	144.077	Rise and Shine Bushland Reserve	Pure
026-63009	B	M	-37.0384	144.101	Muckleford State Forest	Hybrid
026-63010	A	M	-36.8253	144.221	Crusoe Reservoir and No. 7 Park	Hybrid
026-63012	B	M	-36.8253	144.221	Crusoe Reservoir and No. 7 Park	Hybrid
026-63013	B	F	-37.0819	144.074	Muckleford State Forest	Hybrid
026-63014	A	M	-36.8258	144.221	Crusoe Reservoir and No. 7 Park	Hybrid
026-63015	A	M	-36.8258	144.221	Crusoe Reservoir and No. 7 Park	Hybrid
026-63016	B	F	-37.083	144.077	Muckleford State Forest	Hybrid
026-63017	B	M	-36.8261	144.22	Crusoe Reservoir and No. 7 Park	Pure
026-63018	B	F	-37.0619	144.089	Muckleford Nature Conservation Reserve	Hybrid
026-63019	B	M	-37.0577	144.112	Muckleford Nature Conservation Reserve	Hybrid
026-63020	A	M	-36.8488	144.303	Greater Bendigo National Park	Hybrid
026-63021	A	F	-37.0246	143.78	Havelock State Forest	Pure
026-63022	A	F	-36.9734	143.734	Timor State Forest	Pure
026-63023	A	M	-37.0269	143.773	Havelock State Forest	Pure
026-63024	A	M	-36.97	143.733	Timor State Forest	Pure
026-63027	A	F	-36.8062	144.202	Bendigo Regional Park	Hybrid
026-63028	A	M	-36.806	144.203	Bendigo Regional Park	Hybrid
026-63029	A	M	-36.8053	144.203	Bendigo Regional Park	Hybrid
026-63030	A	M	-36.9982	143.749	Timor State Forest	Pure
026-63031	B	F	-37.0819	144.074	Muckleford State Forest	Hybrid
026-63032	A	F	-37.0018	143.75	Timor State Forest	Pure
026-63033	B	M	-37.0829	144.077	Muckleford State Forest	Hybrid
026-63034	B	F	-37.351	144.234	Wombat State Forest	Pure
026-63035	B	F	-37.0613	144.089	Muckleford Nature Conservation Reserve	Hybrid
026-63036	B	M	-37.1667	144.077	Rise and Shine Bushland Reserve	Pure
026-63037	B	M	-37.3571	144.227	Wombat State Forest	Pure
026-63038	A	M	-36.9758	143.735	Timor State Forest	Pure
026-63039	B	M	-37.0613	144.089	Muckleford Nature Conservation Reserve	Hybrid
026-63040	B	M	-37.0396	144.098	Muckleford State Forest	Hybrid
026-63041	B	F	-37.0601	144.089	Muckleford Nature Conservation Reserve	Hybrid
026-63042	A	F	-36.8232	144.217	Crusoe Reservoir and No. 7 Park	Hybrid
026-63043	B	M	-36.8258	144.218	Crusoe Reservoir and No. 7 Park	Hybrid
026-63044	A	F	-36.8251	144.221	Crusoe Reservoir and No. 7 Park	Hybrid
026-63045	B	F	-37.0396	144.098	Muckleford State Forest	Hybrid
026-63046	B	M	-37.3599	144.222	Wombat State Forest	Pure
026-63047	B	F	-37.0636	144.059	Muckleford State Forest	Hybrid
026-63048	B	F	-37.0636	144.059	Muckleford State Forest	Hybrid
026-63049	A	M	-36.8239	144.218	Crusoe Reservoir and No. 7 Park	Hybrid
026-63050	A	M	-37.0296	143.774	Havelock State Forest	Pure
026-63052	B	F	-37.3506	144.23	Wombat State Forest	Pure
026-63053	B	F	-37.3588	144.228	Wombat State Forest	Pure
026-63054	B	F	-37.3606	144.229	Wombat State Forest	Pure
026-63055	B	F	-37.3616	144.22	Wombat State Forest	Pure
026-63056	A	M	-37.0268	143.774	Havelock State Forest	Pure
026-63057	B	F	-37.3615	144.219	Wombat State Forest	Pure
026-63058	A	F	-36.8341	144.23	Crusoe Reservoir and No. 7 Park	Hybrid
026-63059	A	F	-37.0601	144.089	Muckleford Nature Conservation Reserve	Hybrid
026-63060	A	M	-37.0271	143.775	Havelock State Forest	Pure
026-63061	B	M	-37.351	144.232	Wombat State Forest	Pure
026-63063	B	M	-37.3497	144.231	Wombat State Forest	Pure
026-63064	B	M	-37.357	144.227	Wombat State Forest	Pure
026-63066	A	M	-36.8241	144.224	Crusoe Reservoir and No. 7 Park	Hybrid
026-63067	B	F	-37.0269	143.774	Havelock State Forest	Hybrid
026-63069	A	M	-36.9823	143.734	Timor State Forest	Pure
026-63071	B	M	-37.3506	144.23	Wombat State Forest	Pure
026-63072	A	F	-37.0254	143.775	Havelock State Forest	Pure
026-63073	B	M	-37.3508	144.231	Wombat State Forest	Pure
026-63074	A	M	-36.8257	144.218	Crusoe Reservoir and No. 7 Park	Hybrid
026-63076	A	F	-36.9815	143.737	Timor State Forest	Pure
026-63077	A	M	-36.8236	144.22	Crusoe Reservoir and No. 7 Park	Hybrid
026-63078	A	M	-36.9823	143.733	Timor State Forest	Pure
026-63079	B	M	-37.3492	144.234	Wombat State Forest	Pure
026-63085	B	M	-36.8261	144.22	Crusoe Reservoir and No. 7 Park	Hybrid
026-63086	B	M	-37.0616	144.096	Muckleford State Forest	Pure
026-63089	A	M	-36.8232	144.219	Crusoe Reservoir and No. 7 Park	Hybrid
026-63099	B	M	-37.3545	144.226	Wombat State Forest	Pure
027-09424	A	M	-37.0617	144.088	Muckleford State Forest	Hybrid
027-09425	B	M	-37.0634	144.086	Muckleford State Forest	Hybrid
027-09499	A	M	-36.9841	143.734	Timor State Forest	Pure
027-09500	A	M	-36.9745	143.736	Timor State Forest	Pure
ANWC_44864	B	M	-37.7397	148.951	Croajingolong National Park	Pure
ANWC_44878	B	M	-37.6958	147.779	Fairy Dell Nature Conservation Reserve	Pure
ANWC_45052	B	M	-37.5242	142.25	Grampians National Park	Pure
ANWC44929	B	F	-37.8867	145.887	Bunyip State Park	Pure
ANWC44930	B	M	-37.8867	145.887	Bunyip State Park	Pure
ANWC45025	A	M	-37.3272	143.455	Ben Major Nature Conservation Reserve	Pure
ANWC45051	B	M	-37.5242	142.25	Grampians National Park	Pure
ANWC46152	B	M	-37.9	146.1	Bunyip State Park	Pure
ANWC46158	B	M	-38.4	146.5	Mt Hooghly Trig Reserve	Pure
EA085	B	M	-37.8368	145.392	Dandenong Ranges National Park	Pure
EOP_032	B	M	-38.7478	143.272	Great Otway National Park	Pure
EYR_00996	B	F	-37.2314	144.278	Upper Loddon State Forest	Pure
EYR_00997	B	M	-37.2314	144.278	Upper Loddon State Forest	Pure
EYR_00998	B	M	-37.2314	144.278	Upper Loddon State Forest	Pure
EYR_00999	B	M	-37.2314	144.278	Upper Loddon State Forest	Pure
EYR_026	A	M	-36.6174	145.149	Waranga H116 Bushland Reserve	Pure
EYR_027	A	M	-36.6174	145.149	Waranga H116 Bushland Reserve	Pure
EYR_034	A	M	-36.535	143.647	Kooyoora State Park	Pure
EYR_035	A	M	-36.535	143.647	Kooyoora State Park	Pure
EYR_037	A	M	-36.5897	143.578	Kooyoora State Park	Pure
EYR_044	A	F	-36.8011	144.831	Heathcote-Graytown National Park	Pure
EYR_045	A	M	-36.8007	144.832	Heathcote-Graytown National Park	Pure
EYR_049	A	F	-36.8011	144.832	Heathcote-Graytown National Park	Pure
EYR_053	A	M	-36.7936	143.41	Dalyenong Nature Conservation Reserve	Pure
EYR_054	A	F	-36.7935	143.412	Dalyenong Nature Conservation Reserve	Pure
EYR_055	A	M	-36.7935	143.412	Dalyenong Nature Conservation Reserve	Pure
EYR_061	A	F	-36.792	143.41	Dalyenong Nature Conservation Reserve	Pure
EYR_063	A	M	-36.7385	143.505	Tunstalls Nature Conservation Reserve	Pure
EYR_066	A	F	-36.7431	143.503	Tunstalls Nature Conservation Reserve	Pure
EYR_067	A	F	-36.946	143.779	Havelock Nature Conservation Reserve	Pure
EYR_071	A	F	-36.5701	143.809	Kooyoora State Park	Pure
EYR_074	A	M	-36.5641	143.746	Kooyoora State Park	Pure
EYR_075	A	F	-36.5627	143.745	Kooyoora State Park	Pure
EYR_079	A	F	-36.5657	143.748	Kooyoora State Park	Pure
EYR_081	A	M	-36.6565	145.186	Waranga H116 Bushland Reserve	Pure
EYR_084	A	F	-36.6566	145.185	Waranga H116 Bushland Reserve	Pure
EYR_087	A	F	-36.8064	144.775	Heathcote-Graytown National Park	Pure
EYR_089	A	F	-36.8079	144.774	Heathcote-Graytown National Park	Pure
EYR_093	A	F	-36.7404	143.369	Bealiba-Barp State Forest	Pure
EYR_09480	B	M	-37.0608	144.095	Muckleford Nature Conservation Reserve	Hybrid
EYR_09481	A	M	-37.0608	144.095	Muckleford Nature Conservation Reserve	Hybrid
EYR_09482	B	M	-37.0581	144.109	Muckleford State Forest	Hybrid
EYR_09483	B	M	-37.0579	144.112	Muckleford State Forest	Pure
EYR_09484	B	F	-37.0579	144.112	Muckleford State Forest	Hybrid
EYR_09485	B	M	-37.0806	144.077	Muckleford State Forest	Hybrid
EYR_09486	B	M	-37.0806	144.077	Muckleford State Forest	Hybrid
EYR_09487	A	M	-37.0793	144.095	Muckleford State Forest	Hybrid
EYR_09488	B	M	-37.0807	144.077	Muckleford State Forest	Hybrid
EYR_09489	B	M	-37.0801	144.076	Muckleford State Forest	Hybrid
EYR_09490	B	F	-37.0801	144.076	Muckleford State Forest	Hybrid
EYR_09491	B	F	-37.0634	144.085	Muckleford State Forest	Hybrid
EYR_09492	B	F	-37.0634	144.085	Muckleford State Forest	Hybrid
EYR_09493	B	F	-37.0634	144.089	Muckleford State Forest	Hybrid
EYR_09494	B	M	-37.1669	144.083	Pickpocket Diggings Historic & Cultural Features Reserve	Pure
EYR_09495	B	F	-37.1673	144.081	Pickpocket Diggings Historic & Cultural Features Reserve	Pure
EYR_09496	B	M	-37.1686	144.08	Rise and Shine Bushland Reserve	Pure
EYR_09497	B	F	-37.1685	144.08	Rise and Shine Bushland Reserve	Pure
EYR_09498	B	M	-37.1685	144.08	Rise and Shine Bushland Reserve	Pure
EYR_097	A	M	-36.6047	143.596	Kooyoora State Park	Pure
EYR_104	A	M	-36.7848	144.849	Heathcote-Graytown National Park	Pure
EYR_107	A	M	-36.7282	144.852	Heathcote-Graytown National Park	Pure
EYR_108	A	M	-36.8013	144.827	Heathcote-Graytown National Park	Pure
EYR_111	A	F	-36.8013	144.829	Heathcote-Graytown National Park	Pure
EYR_114	A	M	-36.8016	144.827	Heathcote-Graytown National Park	Pure
EYR_116	A	F	-36.8202	144.398	Lyell State Forest	Pure
EYR_122	A	M	-36.7539	144.892	Heathcote-Graytown National Park	Pure
EYR_125	A	M	-36.7539	144.892	Heathcote-Graytown National Park	Pure
EYR_130	A	M	-36.6569	145.182	Waranga H116 Bushland Reserve	Pure
EYR_134	A	M	-36.7866	144.853	Heathcote-Graytown National Park	Pure
EYR_140	A	M	-36.7861	144.853	Heathcote-Graytown National Park	Pure
EYR_142	A	M	-36.7633	143.341	Kooyoora State Park	Pure
EYR_14598	B	F	-37.2314	144.278	Upper Loddon State Forest	Pure
EYR_14599	B	F	-37.2314	144.278	Upper Loddon State Forest	Pure
EYR_14600	B	M	-37.4926	144.421	Lerderderg State Park	Pure
EYR_30406	B	M	-37.4926	144.421	Lerderderg State Park	Pure
EYR_30407	B	F	-37.4928	144.425	Lerderderg State Park	Pure
EYR_30408	B	M	-37.4897	144.421	Lerderderg State Park	Pure
EYR_30409	B	M	-37.4897	144.421	Lerderderg State Park	Pure
EYR_30410	B	F	-37.4917	144.418	Lerderderg State Park	Pure
EYR_30411	B	M	-37.4897	144.421	Lerderderg State Park	Pure
EYR_30412	B	M	-37.4897	144.421	Lerderderg State Park	Pure
EYR_30413	B	M	-37.4897	144.421	Lerderderg State Park	Pure
EYR_30415	B	M	-37.4916	144.416	Lerderderg State Park	Pure
EYR_30416	B	F	-37.9627	144.411	You Yangs Regional Park	Pure
EYR_30417	B	M	-37.9627	144.411	You Yangs Regional Park	Pure
EYR_30418	B	F	-37.9627	144.411	You Yangs Regional Park	Pure
EYR_30419	B	M	-37.9636	144.413	You Yangs Regional Park	Pure
EYR_30420	B	M	-37.9636	144.413	You Yangs Regional Park	Pure
EYR_30421	B	M	-37.961	144.41	You Yangs Regional Park	Pure
EYR_30422	B	M	-37.961	144.41	You Yangs Regional Park	Pure
EYR_30423	B	F	-37.9699	144.41	You Yangs Regional Park	Pure
EYR_30424	B	F	-37.9627	144.411	You Yangs Regional Park	Pure
EYR_30425	B	M	-37.9429	144.428	You Yangs Regional Park	Pure
EYR_30426	B	F	-37.9429	144.428	You Yangs Regional Park	Pure
EYR_30427	B	M	-37.7458	144.308	Brisbane Ranges National Park	Pure
EYR_30428	B	F	-37.7443	144.309	Brisbane Ranges National Park	Pure
EYR_30429	B	F	-37.7492	144.308	Brisbane Ranges National Park	Pure
EYR_30430	B	M	-37.7479	144.308	Brisbane Ranges National Park	Pure
EYR_30431	B	F	-37.7479	144.308	Brisbane Ranges National Park	Pure
EYR_30432	B	F	-37.7458	144.308	Brisbane Ranges National Park	Pure
EYR_30433	B	M	-37.7443	144.309	Brisbane Ranges National Park	Pure
EYR_30434	B	M	-37.7443	144.309	Brisbane Ranges National Park	Pure
EYR_30435	B	F	-37.7479	144.308	Brisbane Ranges National Park	Pure
EYR_30436	B	M	-37.7492	144.308	Brisbane Ranges National Park	Pure
EYR_30437	B	M	-37.8576	144.252	Brisbane Ranges National Park	Pure
EYR_30438	B	F	-37.8571	144.252	Brisbane Ranges National Park	Pure
EYR_30439	B	M	-37.8584	144.252	Brisbane Ranges National Park	Pure
EYR_30440	B	M	-37.8584	144.252	Brisbane Ranges National Park	Pure
EYR_30441	B	M	-37.8571	144.252	Brisbane Ranges National Park	Pure
EYR_30442	B	F	-37.8572	144.252	Brisbane Ranges National Park	Pure
EYR_30443	B	F	-37.3429	144.305	Wombat State Forest	Pure
EYR_30444	B	M	-37.3406	144.306	Wombat State Forest	Pure
EYR_30445	A	F	-36.9417	145.145	Mangalore Nature Conservation Reserve	Hybrid
EYR_30446	B	M	-36.5851	145.944	Reef Heels State Park	Hybrid
EYR_30447	A	M	-36.5851	145.944	Reef Heels State Park	Hybrid
EYR_30448	B	F	-36.5834	145.943	Reef Heels State Park	Hybrid
EYR_30449	B	F	-36.5848	145.948	Reef Heels State Park	Hybrid
EYR_30450	A	F	-36.5834	145.943	Reef Heels State Park	Hybrid
EYR_30451	B	M	-36.5858	145.947	Reef Heels State Park	Hybrid
EYR_30460	B	M	-37.4377	144.41	Wombat State Forest	Pure
EYR_30461	B	F	-37.4352	144.409	Wombat State Forest	Pure
EYR_30462	B	M	-37.4377	144.409	Wombat State Forest	Pure
EYR_30463	B	M	-37.4364	144.413	Wombat State Forest	Pure
EYR_30464	B	F	-37.4377	144.409	Wombat State Forest	Pure
EYR_30465	B	F	-37.4376	144.408	Wombat State Forest	Pure
EYR_30466	B	M	-37.4366	144.409	Wombat State Forest	Pure
EYR_30467	B	F	-37.4364	144.411	Wombat State Forest	Pure
EYR_30468	B	M	-37.0503	145.175	Seymour Bushland Park	Hybrid
EYR_30469	B	M	-37.0503	145.175	Seymour Bushland Park	Hybrid
EYR_30470	B	M	-37.0503	145.175	Seymour Bushland Park	Hybrid
EYR_30471	B	M	-37.1619	145.195	Tallarook State Forest	Pure
EYR_30472	B	M	-37.1611	145.194	Tallarook State Forest	Pure
EYR_30473	B	M	-37.1611	145.194	Tallarook State Forest	Pure
EYR_30476	B	M	-37.1619	145.195	Tallarook State Forest	Pure
EYR_46795	B	M	-37.8576	144.252	Brisbane Ranges National Park	Pure
EYR_46799	B	M	-37.8572	144.252	Brisbane Ranges National Park	Pure
EYR_60452	A	M	-36.9423	145.149	Mangalore Nature Conservation Reserve	Hybrid
EYR_60453	B	M	-36.9406	145.149	Mangalore Nature Conservation Reserve	Hybrid
EYR_60454	A	F	-36.9406	145.149	Mangalore Nature Conservation Reserve	Hybrid
EYR_60456	B	M	-36.9409	145.147	Mangalore Nature Conservation Reserve	Hybrid
EYR_60457	A	M	-36.942	145.147	Mangalore Nature Conservation Reserve	Hybrid
EYR_60458	A	F	-36.9406	145.149	Mangalore Nature Conservation Reserve	Hybrid
EYR002	A	M	-36.8453	144.478	Lyell State Forest	Pure
EYR004	A	M	-36.9713	143.808	Havelock Nature Conservation Reserve	Pure
EYR007	A	M	-36.7825	144.08	Shelbourne Nature Conservation Reserve	Hybrid
EYR008	A	F	-36.7831	144.646	Heathcote-Graytown National Park	Pure
EYR011	A	F	-36.8442	144.48	Lyell State Forest	Pure
EYR014	A	F	-36.8122	143.772	Waanyarra Nature Conservation Reserve	Pure
EYR015	A	M	-36.6293	145.227	Waranga H116 Bushland Reserve	Pure
EYR016	A	F	-36.6293	145.227	Waranga H116 Bushland Reserve	Pure
EYR020	A	M	-36.7804	144.08	Shelbourne Nature Conservation Reserve	Hybrid
EYR023	A	M	-36.8065	144.944	Heathcote-Graytown National Park	Pure
EYR039	A	F	-36.5896	143.577	Kooyoora State Park	Pure
EYR041	A	F	-36.5359	143.734	Kooyoora State Park	Pure
EYR064	A	F	-36.7423	143.502	Tunstalls Nature Conservation Reserve	Pure
Holly_02691002	B	M	-38.4318	143.96	Great Otway National Park	Pure
Holly_02691031	B	F	-38.5007	143.791	Great Otway National Park	Pure
Holly_02691033	B	M	-38.5007	143.791	Great Otway National Park	Pure
Holly_02691062	B	F	-38.4502	143.934	Great Otway National Park	Pure
VIC_043	A	M	-36.8659	144.301	Greater Bendigo National Park	Hybrid
VIC_059	A	M	-37.2575	143.727	Dunach Nature Conservation Reserve	Pure
VIC_060	A	F	-37.2575	143.727	Dunach Nature Conservation Reserve	Pure
VIC_061	A	M	-37.2536	143.741	Dunach Nature Conservation Reserve	Pure
VIC_062	A	M	-37.1275	143.614	Paddys Ranges State Park	Pure
VIC_064	A	M	-37.0796	143.683	Paddys Ranges State Park	Pure
VIC_065	A	M	-37.0756	143.779	Paddys Ranges State Park	Pure
VIC_067	A	M	-37.0301	143.775	Havelock Nature Conservation Reserve	Pure
VIC_068	A	M	-36.9994	143.787	Havelock Nature Conservation Reserve	Pure
VIC_44	A	M	-36.9498	144.711	Heathcote-Graytown National Park	Pure
VIC003	B	M	-36.8299	146.043	Mount Samaria State Park	Pure
VIC008	B	F	-36.8262	146.06	Mount Samaria State Park	Pure
VIC012	B	F	-36.9345	146.069	Mount Samaria State Park	Pure
VIC014	B	M	-36.9345	146.069	Mount Samaria State Park	Pure
VIC016	B	M	-37.279	145.971	Lake Eildon National Park	Pure
VIC018	B	F	-37.3099	146.021	Lake Eildon National Park	Pure
VIC022	B	M	-37.3099	146.021	Lake Eildon National Park	Pure
VIC024	B	M	-37.0618	144.088	Muckleford State Forest	Hybrid
VIC025	A	M	-37.0618	144.088	Muckleford State Forest	Hybrid
VIC026	B	M	-37.126	144.253	Castlemaine Diggings National Heritage Park	Pure
VIC028	B	M	-37.126	144.253	Castlemaine Diggings National Heritage Park	Pure
VIC030	B	F	-37.1671	144.218	Castlemaine Diggings National Heritage Park	Pure
VIC031	B	M	-37.1671	144.218	Castlemaine Diggings National Heritage Park	Pure
VIC032	B	M	-37.2253	144.209	Castlemaine Diggings National Heritage Park	Pure
VIC034	B	M	-37.2253	144.209	Castlemaine Diggings National Heritage Park	Pure
VIC036	A	M	-36.8289	144.266	Bendigo Regional Park	Hybrid
VIC037	A	M	-36.8352	144.271	Bendigo Regional Park	Hybrid
VIC038	A	M	-36.8659	144.301	Greater Bendigo National Park	Hybrid
VIC040	A	M	-36.8659	144.301	Greater Bendigo National Park	Hybrid
VIC046	A	M	-36.9427	144.688	Heathcote-Graytown National Park	Pure
VIC048	A	M	-36.9649	144.712	Heathcote-Graytown National Park	Pure
VIC050	A	F	-36.9785	144.751	Heathcote-Graytown National Park	Pure
VIC052	A	M	-36.9785	144.751	Heathcote-Graytown National Park	Pure
VIC053	B	M	-37.0229	144.118	Muckleford State Forest	Hybrid
VIC054	A	M	-37.0167	144.115	Muckleford State Forest	Hybrid
VIC055	B	F	-37.0167	144.115	Muckleford State Forest	Hybrid
VIC056	B	M	-37.0167	144.115	Muckleford State Forest	Hybrid
VIC057	B	F	-37.0167	144.115	Muckleford State Forest	Hybrid
VIC058	A	M	-36.9785	144.75	Heathcote-Graytown National Park	Pure
